# Supplementary material for: Efficient spatial self-phase modulation in the near-infrared and visible regimes of transition metal carbonitride Ti3CN
Source: Royal Society of Chemistry journal article supplement (doi:10.1039/d4nr05424e), 2025-01-01
Supplement: d4nr05424e1.pdf [file d4nr05424e1.pdf]

## 1 Supplementary Information

### 2 **Efficient near-infrared and visible regime spatial self-phase** 3 **modulation in transition metal carbonitride Ti<sub>3</sub>CN**

4 Jiawei Cao,<sup>a</sup> Xiaodan Xu,<sup>a</sup> Yixuan Huang,<sup>b,c</sup> Tengdong Zhang,<sup>a</sup> Ying Liu,<sup>a</sup> Haotian  
5 Yang,<sup>a</sup> Jimin Zhao,<sup>\*b,c,d</sup> Jun Li,<sup>\*a</sup> and Yanling Wu<sup>\*a</sup>

6 <sup>a</sup>*State Key Laboratory of Metastable Materials Science and Technology & Hebei Key*  
7 *Laboratory of Microstructural Material Physics, School of Science, Yanshan University,*  
8 *Qinhuangdao 066004, China*

9 <sup>b</sup>*Beijing National Laboratory for Condensed Matter Physics, Institute of Physics, Chinese*  
10 *Academy of Sciences, Beijing 100190, China*

11 <sup>c</sup>*School of Physical Sciences, University of Chinese Academy of Sciences, Beijing 100049,*  
12 *China*

13 <sup>d</sup>*Songshan Lake Materials Laboratory, Dongguan, Guangdong 523808, China*

14 <sup>†</sup>*Electronic supplementary information (ESI) available.*

15 <sup>\*</sup>Corresponding author, Email: [jmzhao@iphy.ac.cn](mailto:jmzhao@iphy.ac.cn); [ljcj007@ysu.edu.cn](mailto:ljcj007@ysu.edu.cn); [ylwu@ysu.edu.cn](mailto:ylwu@ysu.edu.cn)

16

#### 17 **S1. Sample preparation of Ti<sub>3</sub>CN flake suspension**

18 The few-layer MXene Ti<sub>3</sub>CN dispersion we bought is at the concentration of 5  
19 mg/ml (ultrapure water as the solvent). We dilute the pre-prepared Ti<sub>3</sub>CN solution to a  
20 concentration of 0.05 mg/ml by adding the solvent ultrapure water. Then we execute a  
21 sonicating operation for the solution for 30 minutes (at 40 kHz frequency) to obtain the  
22 dispersed suspension, which subsequently is transferred into a standard cuvette with a  
23 thickness of 10 mm on standby for SSPM measurements. In parallel, we conducted the  
24 control SSPM experiments on solvent, where no SSPM effect was observed.

#### 25 **S2. Key parameters of laser beams in SSPM experiment**

26 A series of continuous-wave laser beams (405, 473, 532, 671, 721, 914 and 1064  
27 nm) are used to investigate SSPM effect. For Gaussian beams, we define the radius of  
28 beam waist of the laser incident beam  $\omega_0$  is approximately equal to the the  $1/e^2$  intensity  
29 radius of laser beams. When the beam passes through a lens with a focal length of  $f =$   
30 200 mm, the radius of the beam waist at the focal point is defined as  $\omega_0'$ , where

1  $\omega_0' \approx \frac{\lambda}{\pi\omega_0} f$ . In this work, the distance between the focusing lens and the center of  
2 cuvette ( $l$ ) is fixed at 160 mm. Therefore, the  $1/e^2$  intensity radius at the center of cuvette  
3 can be calculated by the equation  $\omega(z) = \omega_0' \sqrt{1 + (z/z_R)^2}$ , where  $\omega(z)$  is the  $1/e^2$   
4 intensity radius of laser beam when the distance between the focal point and the center  
5 of cuvette is  $z$  (here  $z = 40$  mm),  $z_R \approx \frac{\pi\omega_0'^2}{\lambda}$ , the beam area at the center of cuvette is  $S$   
6  $= \pi(\omega(z))^2$ .

7 Table S1. Detailed key parameters of laser beams in SSPM experiment.

| $\lambda$ (nm) | $\omega_0$ (mm) | $z$ (mm) | $\omega_0'$ (mm) | $\omega(z)$ (mm) | $S$ (mm <sup>2</sup> ) |
|----------------|-----------------|----------|------------------|------------------|------------------------|
| 405            | 0.80            | 40       | 0.032            | 0.163            | 0.0835                 |
| 473            | 0.71            | 40       | 0.042            | 0.148            | 0.0690                 |
| 532            | 0.77            | 40       | 0.044            | 0.160            | 0.0804                 |
| 671            | 0.86            | 40       | 0.050            | 0.179            | 0.1000                 |
| 721            | 0.64            | 40       | 0.072            | 0.147            | 0.0679                 |
| 914            | 0.89            | 40       | 0.065            | 0.190            | 0.1134                 |
| 1064           | 0.72            | 40       | 0.094            | 0.172            | 0.0929                 |

### 8 S3. Process of SSPM diffraction rings formation and deformation

9 For suspension sample, the stable SSPM rings formation includes two processes:  
10 one is the process varying from the ring generation until to its maximum in its ring  
11 number and diameter, another is the process varying from the maximum rings to the  
12 stable deformation rings. Since the second process originate from the thermal-  
13 convection-induced ring deformation, we only focus on the first process related to the  
14 electron coherence.<sup>1,2</sup> In Fig. S1, as a typical example, we show the evolution process  
15 of SSPM diffraction rings of Ti<sub>3</sub>CN suspension over the time at 532 nm with the  
16 incident intensity of 260.0 W/cm<sup>2</sup>. There are two clear processes: One is that the  
17 number of rings increases from zero to a maximum taking 0.33 s, which is a nonlinear  
18 process of laser-induced electron/hole coherence establishment.<sup>1</sup> Another one is that

- 1 the upper half portion of ring patterns begins to collapse from the maximum until stable
- 2 taking 1.84 s, which is the process of thermal convection-induced ring deformation
- 3 (thermal effect).<sup>2</sup>

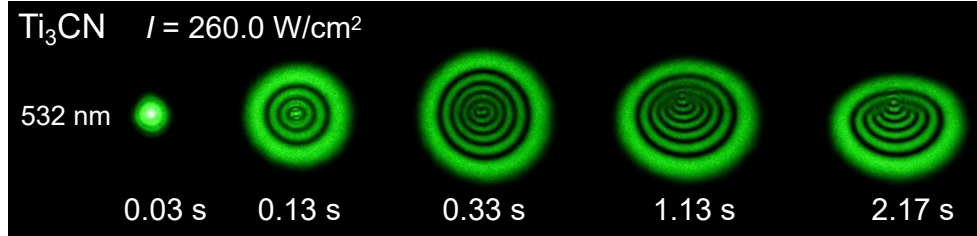

4  
5 Fig. S1. Process of SSPM diffraction rings evolution over the time for the Ti<sub>3</sub>CN flake  
6 suspension at 532 nm excitation.

7 **S4. Typical SSPM ring patterns with maximum diameters**

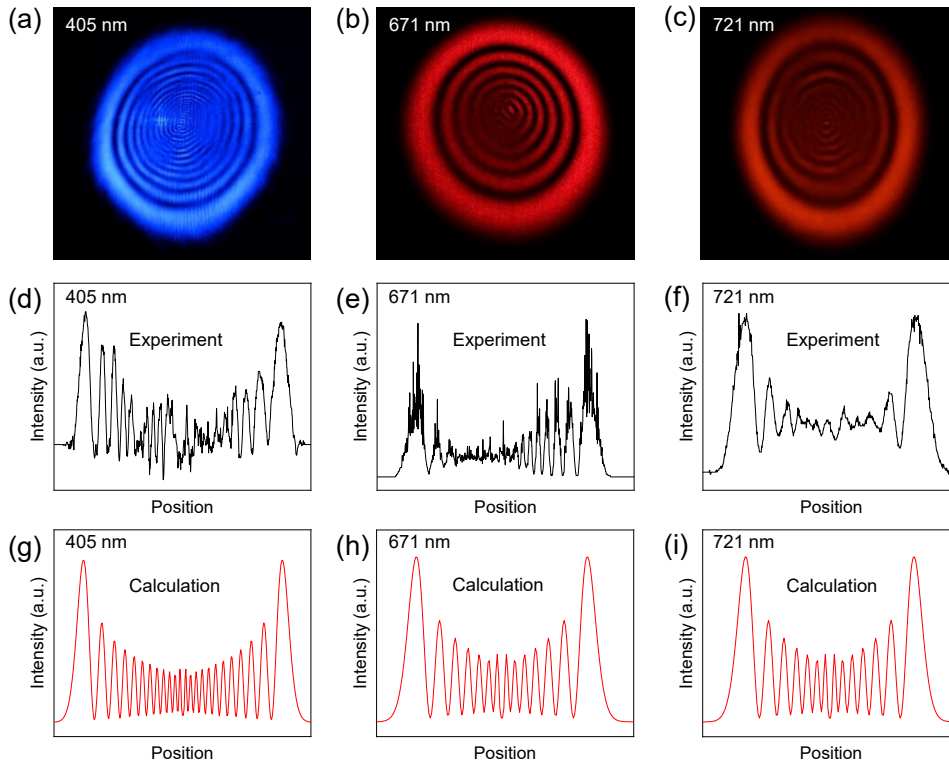

8  
9 Fig. S2. Typical SSPM ring patterns with maximum diameters under 405 nm, 671 nm  
10 and 721 nm laser beam excitation.

11 **S5. Estimation of the effective layer number for Ti<sub>3</sub>CN and Ti<sub>3</sub>AlCN suspensions**

12 The number of effective layers of the laser beam passing through the Ti<sub>3</sub>CN  
13 suspension is estimated by the concentration estimation method.<sup>1</sup> The Ti<sub>3</sub>CN flakes are

1 uniformly dispersed in solvent and there is no sediment at the bottom of cuvette. The  
2 concentration of the Ti<sub>3</sub>CN suspension was  $\rho = 0.05$  g/L ( $2.948 \times 10^{-4}$  mol/L). The  
3 volume of solution contained in the cuvette is  $V = 4 \times 10^{-3}$  L. Thus, the total number of  
4 molecules in the suspensions is  $M = \rho \times V \times N_A = 3.549 \times 10^{17}$  for Ti<sub>3</sub>CN. Ti<sub>3</sub>CN  
5 possesses a crystal structure with the P6<sub>3</sub>/mmc space group, where the lattice constants  
6 of Ti<sub>3</sub>CN are  $a = 3.02$  Å and  $b = 3.02$  Å. Hence, a single effective layer contains  $m =$   
7  $S/S_{ab} = S/(\sin 60^\circ) \cdot (a \cdot b) = 5.064 \times 10^{15}$  molecules for Ti<sub>3</sub>CN. The layer number is given  
8 by  $N_{\text{eff}} = M/m$ . We estimate the effective layer number to be 70 for Ti<sub>3</sub>CN.

9 **S6. Comparison of  $\chi_{\text{monolayer}}^{(3)}$  values among various 2D materials.**

10 Table S2. Comparison of  $\chi_{\text{monolayer}}^{(3)}$  among various 2D materials.

| Materials                                     | $\lambda$ [nm] | $\chi_{\text{monolayer}}^{(3)}$ [e.s.u.] | References |
|-----------------------------------------------|----------------|------------------------------------------|------------|
| Ti <sub>3</sub> CN                            | 532            | $5.35 \times 10^{-9}$                    | this work  |
| Ti <sub>3</sub> CN                            | 914            | $5.41 \times 10^{-9}$                    |            |
| Ti <sub>3</sub> CN                            | 1064           | $5.19 \times 10^{-9}$                    |            |
| BP                                            | 914            | $7.28 \times 10^{-9}$                    | 3          |
| BP                                            | 1064           | $6.08 \times 10^{-9}$                    |            |
| VP                                            | 914            | $2.11 \times 10^{-9}$                    |            |
| VP                                            | 1064           | $1.81 \times 10^{-9}$                    |            |
| Ti <sub>3</sub> C <sub>2</sub> T <sub>x</sub> | 532            | $10^{-7}$                                | 4          |
| Ti <sub>3</sub> C <sub>2</sub> T <sub>x</sub> | 671            | $10^{-8}$                                | 4          |
| Ti <sub>3</sub> C <sub>2</sub> T <sub>x</sub> | 800            | $10^{-8}$                                | 5          |
| Ti <sub>3</sub> C <sub>2</sub> T <sub>x</sub> | 1064           | $10^{-7}$                                | 5          |
| Ti <sub>2</sub> CT <sub>x</sub>               | 1064           | $1.14 \times 10^{-10}$                   | 6          |
| Nb <sub>2</sub> C                             | 400            | $2.43 \times 10^{-9}$                    | 7          |
| Nb <sub>2</sub> C                             | 800            | $6.07 \times 10^{-9}$                    | 7          |
| Graphene                                      | 532            | $10^{-7}$                                | 2          |
| MoS <sub>2</sub>                              | 532            | $1.60 \times 10^{-9}$                    | 1          |

|                                 |              |                       |    |
|---------------------------------|--------------|-----------------------|----|
| MoSe <sub>2</sub>               | 532          | $1.10 \times 10^{-9}$ | 8  |
| SnS                             | 532/633      | $10^{-10}$            | 9  |
| Bi <sub>2</sub> Te <sub>3</sub> | 400/800/1070 | $10^{-7}$             | 10 |
| NiPS <sub>3</sub>               | 532          | $2.64 \times 10^{-9}$ | 11 |

## 1 S7. Process of SSPM diffraction rings formation

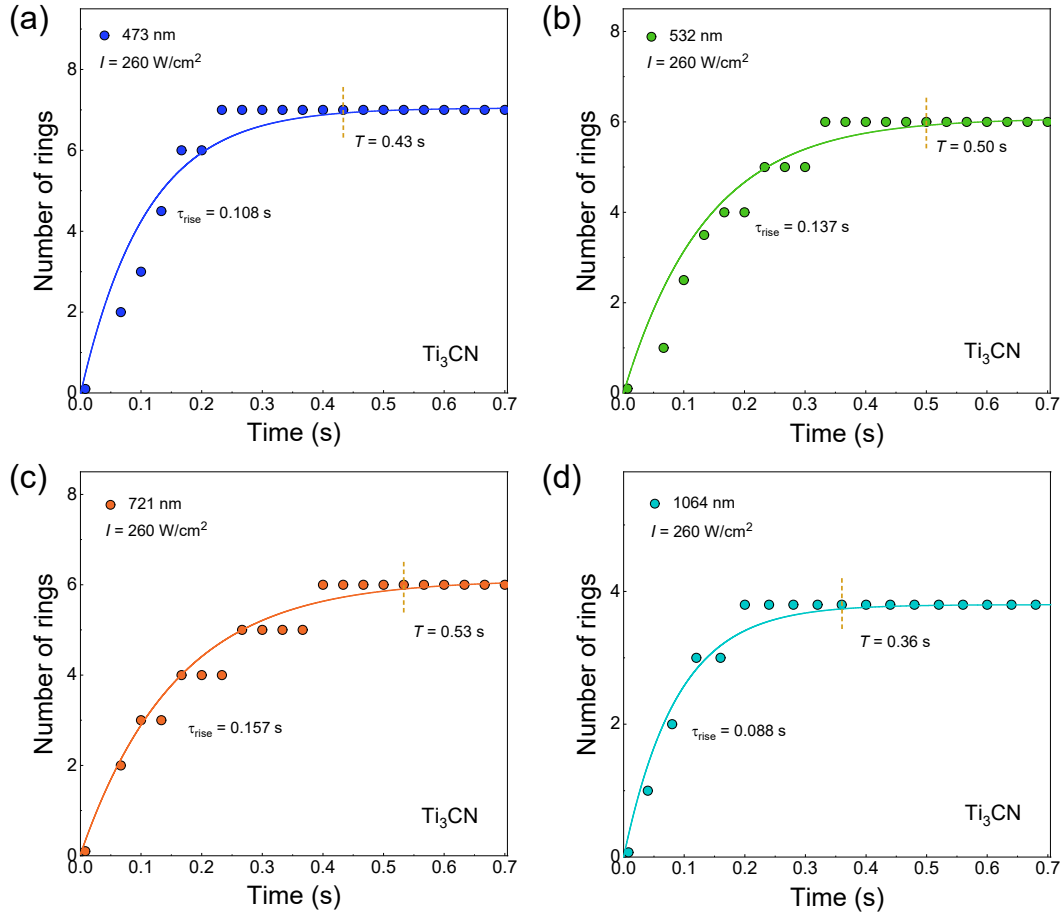

2

3 Fig. S3. (a)-(d) Evolution of the ring number over time at 473 nm, 532 nm, 721 nm and  
4 1064 nm. Solid lines: fitting curves with one-exponential function. The dashed orange  
5 lines denote the formation time.

## 6 S8. Calculation Method of Dielectric Constant for Ti<sub>3</sub>CN

7 According to the first principles calculation based on DFT, we obtained the optical  
8 properties of Ti<sub>3</sub>CN through the Vienna Ab-initio Simulation Package (VASP)  
9 program.<sup>12</sup> The exchange and correlation potentials were Perdew-Burke-Ernzerhof

1 method based on generalized gradient approximation (GGA). The plane wave cut-off  
2 energy in the wave vector  $K$  space was set to be 700 eV, a Monkhorst-Pack  $k$  lattice  
3 with a spacing of  $2\pi \times 0.03 \text{ \AA}^{-1}$  was employed. When the total energy was stabilized  
4 within  $1 \times 10^{-8}$  eV, the force on each atom of the cell after optimization was less than  
5  $0.015 \text{ eV/\AA}$ . Hence, the real part of dielectric function  $\epsilon$  as a function of photon energy  
6 is shown in Fig. S4.

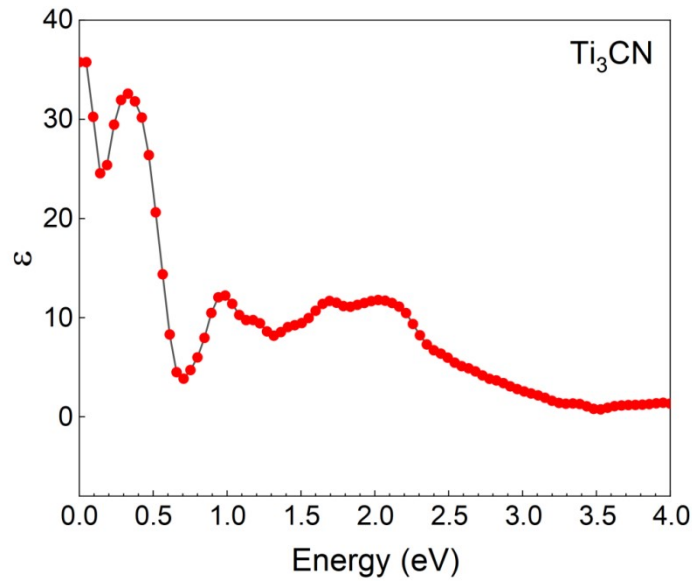

7

8 Fig. S4. Real ( $\epsilon$ ) part of dielectric function obtained through calculation as a function  
9 of photon energy for  $\text{Ti}_3\text{CN}$ .

10

## 11 References

12 1. Y. L. Wu, Q. Wu, F. Sun, C. Cheng, S. Meng, and J. M. Zhao, Proc. Natl. Acad.  
13 Sci. U. S. A., 2015, **112**, 11800-11805.

14 2. R. Wu, Y. L. Zhang, S. C. Yan, F. Bian, W. L. Wang, X. D. Bai, X. H. Lu, J. M.  
15 Zhao, and E. G. Wang, Nano Lett., 2011, **11**, 5159-5164.

16 3. X. D. Xu, M. Wang, Y. Q. Zhang, Q. F. Li, W. S. Niu, Y. F. Yang, J. M. Zhao, and  
17 Y. L. Wu, Laser Photon. Rev., 2024, **18**, 2300930.

18 4. L. M. Wu, X. T. Jiang, J. L. Zhao, W. Y. Liang, Z. J. Li, W. C. Huang, Z. T. Lin, Y.  
19 Z. Wang, F. Zhang, S. B. Lu, Y. J. Xiang, S. X. Xu, J. Q. Li, and H. Zhang, Laser  
20 Photon. Rev., 2018, **12**, 1800215.

- 1 5. J. Li, Z. L. Zhang, J. Yi, L. L. Miao, J. Huang, J. R. Zhang, Y. He, B. Huang, C. J.
- 2 Zhao, Y. H. Zou, and S. C. Wen, *Nanophotonics*, 2020, **9**, 2415-2424.
- 3 6. J. Yi, J. Li, S. H. Huang, L. Y. Hu, L. L. Miao, C. J. Zhao, S. C. Wen, V. N.
- 4 Mochalin, and A. M. Rao, *InfoMat*, 2020, **2**, 601-609.
- 5 7. S. Xiao, Y. L. He, Y. L. Dong, Y. D. Wang, L. Zhou, X. J. Zhang, Y. W. Wang,
- 6 and J. He, *Front. Physics*, 2021, **9**, 674820.
- 7 8. W. H. Wang, Y. L. Wu, Q. Wu, J. J. Hua, and J. M. Zhao, *Sci Rep*, 2016, **6**, 19637.
- 8 9. L. M. Wu, Z. J. Xie, L. Lu, J. L. Zhao, Y. Z. Wang, X. T. Jiang, Y. Q. Ge, F. Zhang,
- 9 S. B. Lu, Z. N. Guo, J. Liu, Y. J. Xiang, S. X. Xu, J. Q. Li, D. Y. Fan, and H. Zhang,
- 10 *Adv. Opt. Mater.*, 2018, **6**, 1700985.
- 11 10. B. X. Shi, L. L. Miao, Q. K. Wang, J. Du, P. H. Tang, J. Liu, C. J. Zhao, and S. C.
- 12 Wen, *Appl. Phys. Lett.*, 2015, **107**, 151101.
- 13 11. J. Li, W. S. Niu, X. D. Xu, M. Wang, Z. W. Xu, J. W. Cao, Y. Liu, J. M. Li, J. M.
- 14 Zhao, and Y. L. Wu, *Opt. Express*, 2025, **33**, 1044-1057.
- 15 12. P. E. Blochl, *Phys. Rev. B.*, 1994, **50**, 17953-17979.
